# Supplementary material
Source: PubMed Central journal article supplement (PMC4447502)
Supplement: NIHMS489052-supplement-1_si_001.pdf [file NIHMS489052-supplement-1_si_001.pdf]

# **Quantitative Analysis of Metabolic Mixtures by 2D $^{13}\text{C}$ -Constant-Time TOCSY NMR Spectroscopy**

Kerem Bingol,<sup>1,2</sup> Fengli Zhang,<sup>2</sup> Lei Bruschweiler-Li,<sup>2,3</sup> and Rafael Brüschweiler<sup>\*1,2,3</sup>

<sup>1</sup>Institute of Molecular Biophysics, Florida State University, Tallahassee, Florida 32306

<sup>2</sup>National High Magnetic Field Laboratory, Florida State University, Tallahassee, Florida 32310

<sup>3</sup>Department of Chemistry and Biochemistry, Florida State University, Tallahassee, Florida 32306

\*To whom correspondence should be addressed:

Rafael Brüschweiler, 102 Varsity Way, CSL Rm. 3006, Florida State University, Tallahassee, FL 32306-4390. Phone +1 (850) 644-1768; Fax +1 (850) 644-8281;

Email: [bruschweiler@magnet.fsu.edu](mailto:bruschweiler@magnet.fsu.edu)

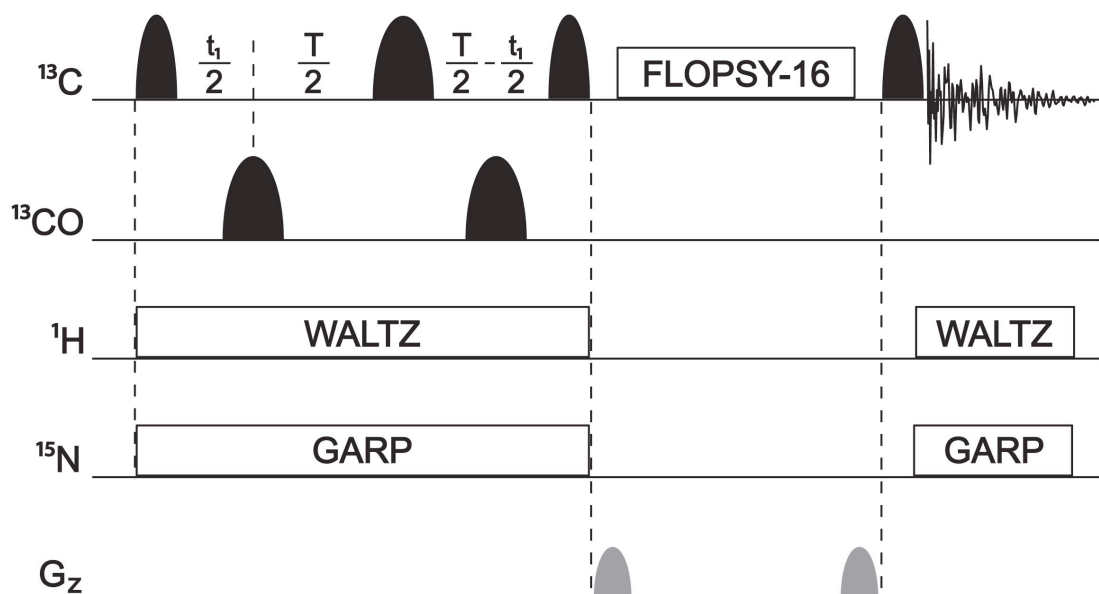

**Figure S-1.** Pulse sequence of 2D  $^{13}\text{C}$ - $^{13}\text{C}$  constant-time (CT) TOCSY experiment. Narrow and wide black semi-elliptical shapes on the carbon channel ( $^{13}\text{C}$ ) represent  $\pi/2$  and  $\pi$  shaped radio-frequency pulses, respectively. The constant-time period  $T$  is chosen so that  $T = 1/{}^1J_{CC} \cong 1/37.6 \text{ Hz} = 26.6 \text{ ms}$ . Pulse phases are cycled as follows: three  $\pi/2$  pulses from left to right = (x, -x), (x, x, x, x, -x, -x, -x, -x), (x, x, -x, -x); all three  $\pi$  pulses = (x); and receiver phase = (x, -x, -x, x, -x, x, x, -x). The pulse lengths are  $248 \mu\text{s}$  for  $\pi/2$  pulses and  $192 \mu\text{s}$  for  $\pi$  pulses. The  $\pi/2$  pulses are Gaussian cascade 4 ( $G4$ )<sup>1</sup> pulses and the  $\pi$  pulses are Quaternion cascade 3 ( $Q3$ )<sup>2</sup> pulses. The pulsed-field gradient pulses have a duration of 1 ms with a gradient strength of 38.5 G/cm and 33.7 G/cm, respectively. Quadrature detection in the indirect dimension is achieved by the States-TPPI method.  $^1\text{H}$  and  $^{15}\text{N}$  (in the case of  $^{15}\text{N}$  enriched samples) are decoupled during  $t_1$  and  $t_2$  periods by WALTZ and GARP schemes, respectively. TOCSY mixing is performed by FLOPSY-16. The mixing times are set to 4.7 ms for short and 47 ms for long TOCSY mixing.

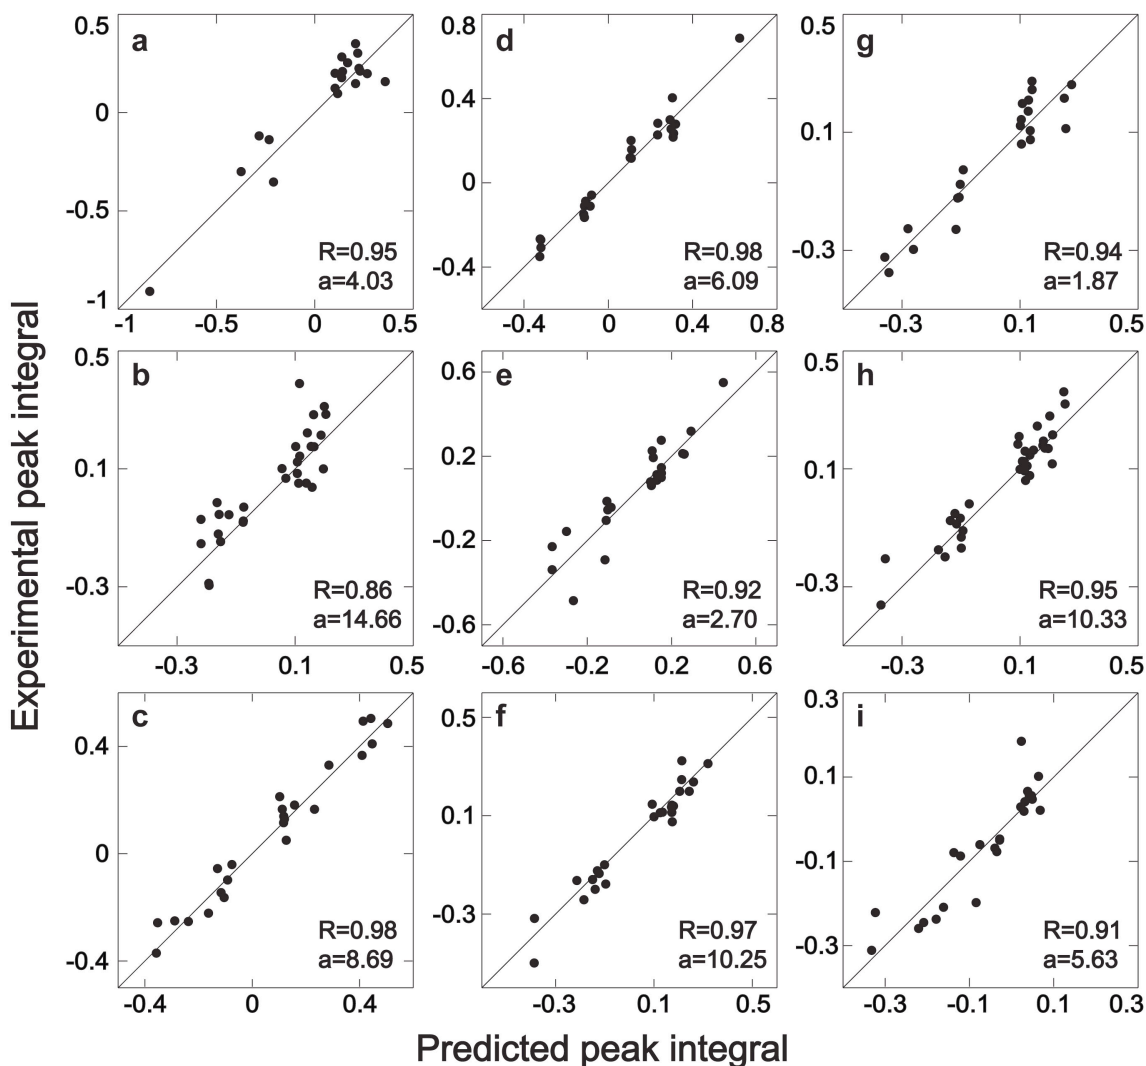

**Figure S-2.** Quantitative comparison of experimental and simulated (predicted) cross-peak integrals of 2D  $^{13}\text{C}$ - $^{13}\text{C}$  constant-time (CT) TOCSY with a long mixing time ( $\tau_m = 47$  ms) of 9 carbohydrate isomers: fructose  $\beta$ -furanose (a), fructose  $\beta$ -pyranose (b), glucose  $\beta$ -pyranose (c), glucose  $\alpha$ -pyranose (d), ribose  $\beta$ -furanose (e), ribose  $\beta$ -pyranose (f), ribose  $\alpha$ -furanose (g), galactose  $\beta$ -pyranose (h) and galactose  $\alpha$ -pyranose (i). Fructose  $\alpha$ -furanose is not shown in this figure. The predicted peak integrals are based on the quantum-mechanical treatment of Eq. (1) (Method A). Parameters R and a are defined as in Figure 2 and 3 of the main text.

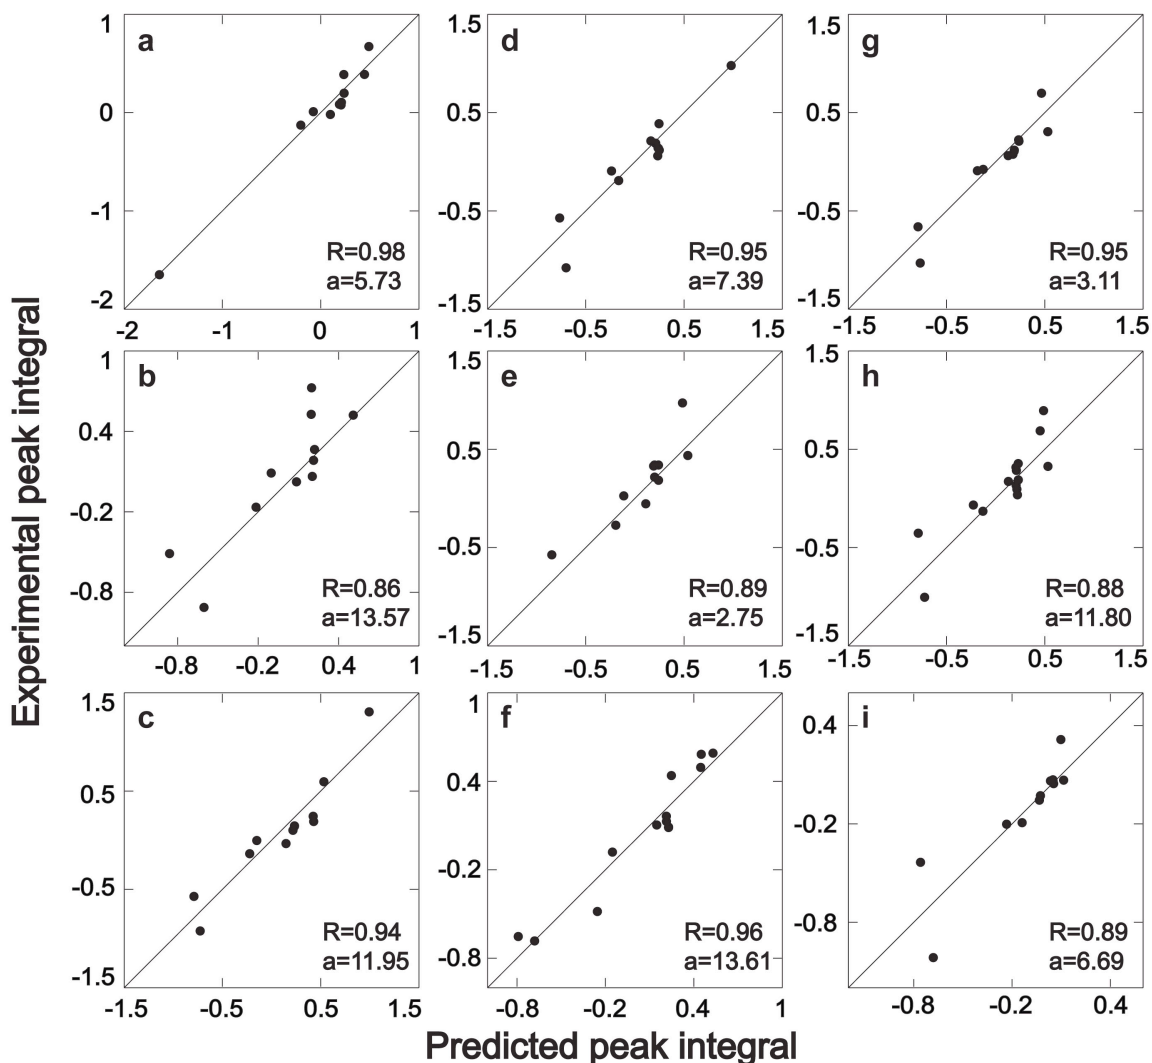

**Figure S-3.** Quantitative comparison of experimental and simulated (predicted) cross-peak integrals of 2D  $^{13}\text{C}$ - $^{13}\text{C}$  constant-time (CT) TOCSY with a short mixing time ( $\tau_m = 4.7$  ms) of the same 9 carbohydrate isomers as in Figure S-2: fructose  $\beta$ -furanose (a), fructose  $\beta$ -pyranose (b), glucose  $\beta$ -pyranose (c), glucose  $\alpha$ -pyranose (d), ribose  $\beta$ -furanose (e), ribose  $\beta$ -pyranose (f), ribose  $\alpha$ -furanose (g), galactose  $\beta$ -pyranose (h) and galactose  $\alpha$ -pyranose (i). The predicted peak integrals are based on the quantum-mechanical treatment of Eq. (1) (Method B). Parameters R and a are defined as in Figure 2 and 3 of the main text.

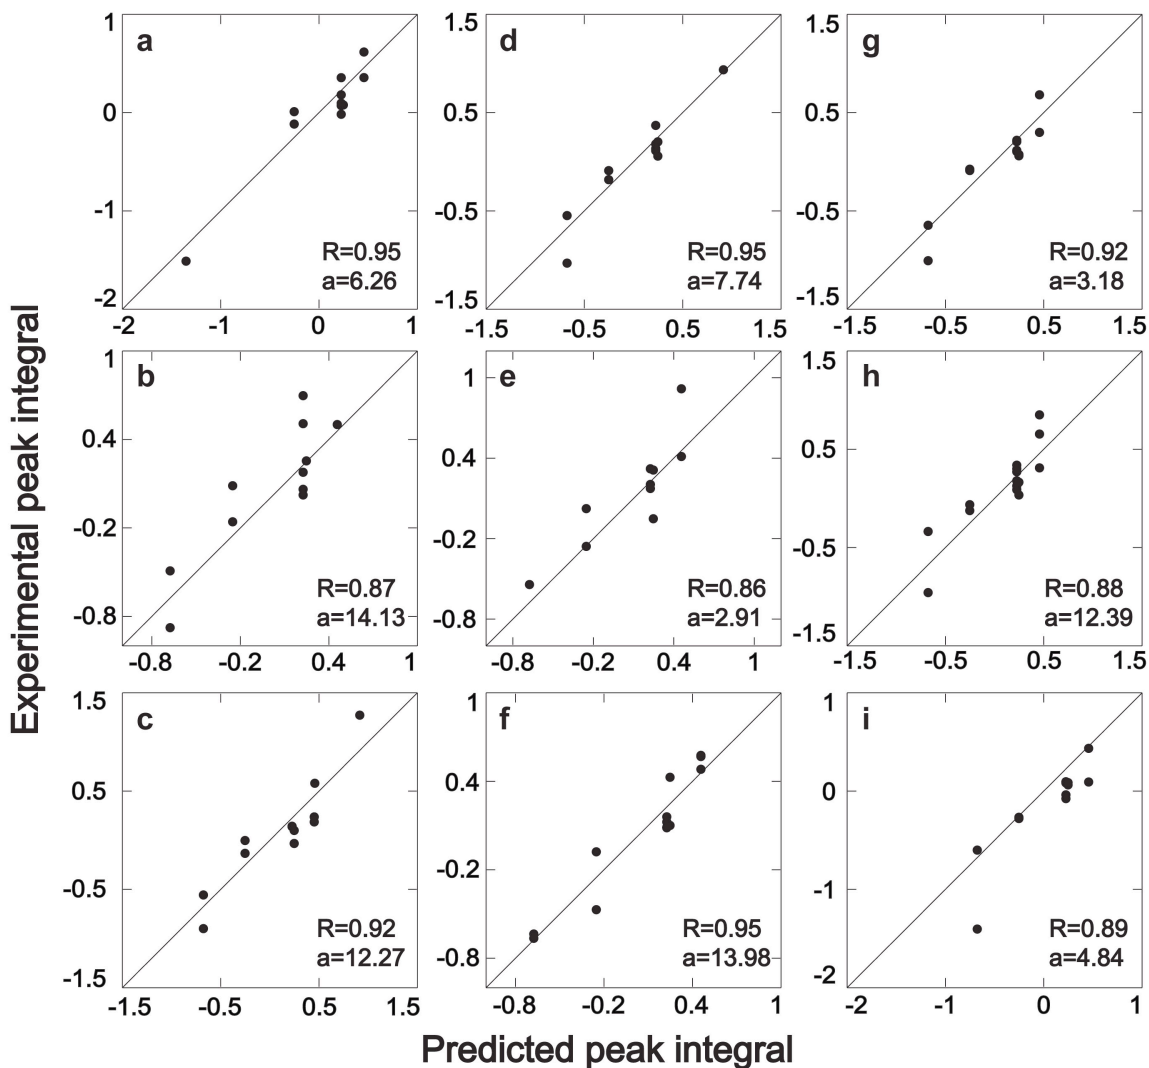

**Figure S-4.** Quantitative comparison of experimental and simulated (predicted) cross-peak integrals of 2D  $^{13}\text{C}$ - $^{13}\text{C}$  constant-time (CT) TOCSY with a short mixing time ( $\tau_m = 4.7$  ms) of the same 9 carbohydrate isomers as in Figure S-2: fructose  $\beta$ -furanose (a), fructose  $\beta$ -pyranose (b), glucose  $\beta$ -pyranose (c), glucose  $\alpha$ -pyranose (d), ribose  $\beta$ -furanose (e), ribose  $\beta$ -pyranose (f), ribose  $\alpha$ -furanose (g), galactose  $\beta$ -pyranose (h) and galactose  $\alpha$ -pyranose (i). The predicted peak integrals are based on the analytical approximations (Method C).

## References

- (1) Emsley, L.; Bodenhausen, G. *Chem. Phys. Lett.* **1990**, *165*, 469-476.
- (2) Emsley, L.; Bodenhausen, G. *J. Magn. Reson.* **1992**, *97*, 135-148.
